# Supplementary material
Source: PubMed Central journal article supplement (PMC3171217)
Supplement: supp_138.19.4131_DEV065870TableS1.pdf [file supp_138.19.4131_DEV065870TableS1.pdf]

**Table S1. Cell counts for Fig. 7A-C**

| Epithelial compartment   | Number of cells per mm OE ( $\pm$ s.e.m.) |                                             |                            |                                                                 |
|--------------------------|-------------------------------------------|---------------------------------------------|----------------------------|-----------------------------------------------------------------|
|                          | WT                                        | <i>Act<math>\beta</math>B<sup>-/-</sup></i> | <i>Gdf11<sup>-/-</sup></i> | <i>Gdf11<sup>-/-</sup>;Act<math>\beta</math>B<sup>-/-</sup></i> |
| <b>Sustentacular</b>     |                                           |                                             |                            |                                                                 |
| SOX2 <sup>+</sup> cells  | 270 (18)                                  | 295 (17)                                    | 437 (2)*                   | 664 (7)*                                                        |
| ASCL1 <sup>+</sup> cells | 4 (2)                                     | 6 (1)                                       | 8 (3)                      | 4 (1)                                                           |
| Double-positive cells    | 9 (1)                                     | 17 (2)                                      | 11 (1)                     | 21 (1)*                                                         |
| <b>Stem/progenitor</b>   |                                           |                                             |                            |                                                                 |
| SOX2 <sup>+</sup> cells  | 99 (3)                                    | 102 (4)                                     | 102 (4)                    | 137 (7)*                                                        |
| ASCL1 <sup>+</sup> cells | 32 (2)                                    | 46 (7)*                                     | 30 (6)                     | 50 (4)*                                                         |
| Double-positive cells    | 32 (8)                                    | 58 (4)*                                     | 42 (3)                     | 60 (3)*                                                         |

The number of single SOX2<sup>+</sup>; single ASCL1<sup>+</sup>; and SOX2<sup>+</sup> ASCL1<sup>+</sup> cells was quantified in the sustentacular (apical third of OE) and stem/progenitor cell (basal two-thirds of OE) compartments in E17.5 OE as described in Materials and methods. Data shown are absolute numbers for the percentages given in the bar charts in Fig. 7A-C. \*,  $P \leq 0.05$  (Dunnett's test) compared with wild type.
