# Supplementary material
Source: PubMed Central journal article supplement (PMC3171217)

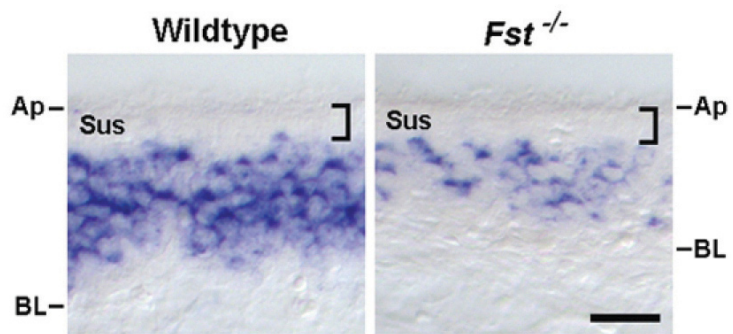

Supplement: supp_138.19.4131_DEV065870FigS1.pdf [file supp_138.19.4131_DEV065870FigS1.pdf]

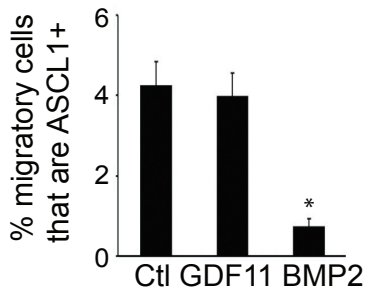

Supplement: supp_138.19.4131_DEV065870FigS2.pdf [file supp_138.19.4131_DEV065870FigS2.pdf]

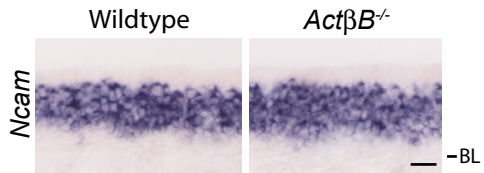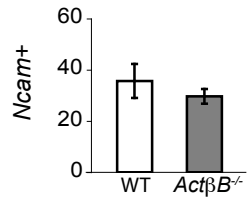

Supplement: supp_138.19.4131_DEV065870FigS3.pdf [file supp_138.19.4131_DEV065870FigS3.pdf]

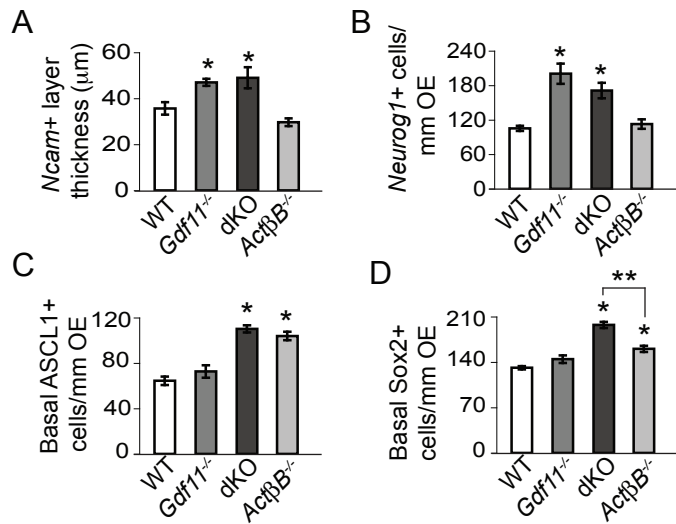

Supplement: supp_138.19.4131_DEV065870FigS4.pdf [file supp_138.19.4131_DEV065870FigS4.pdf]
